# Supplementary material for: The New MISR Research Aerosol Retrieval Algorithm: A Multi-Angle, Multi-Spectral, Bounded-Variable Least Squares Retrieval of Aerosol Particle Properties over Both Land and Water
Source: Copernicus journal article supplement (doi:10.5194/amt-2022-95), 2022-03-23
Supplement: Supplementary file 1 [file amt-2022-95-supplement.pdf]

**Supplemental to:**  
**The New MISR Research Aerosol Retrieval Algorithm: A Multi-  
Angle, Multi-Spectral, Bounded-Variable Least Squares Retrieval of  
5 Aerosol Particle Properties over Both Land and Water**

James A. Limbacher<sup>1,2,3</sup>, Ralph A. Kahn<sup>1</sup>, and Jaehwa Lee<sup>1,4</sup>

<sup>1</sup>Earth Science Division, NASA Goddard Space Flight Center, Greenbelt, 20771, USA

<sup>2</sup>Science Systems and Applications Inc., Lanham, 20706, USA

<sup>3</sup>Department of Meteorology and Atmospheric Science, The Pennsylvania State University, State College, 16802, USA

10 <sup>4</sup>University of Maryland, College Park, MD, USA

*Correspondence to:* James A. Limbacher (James.Limbacher@nasa.gov)

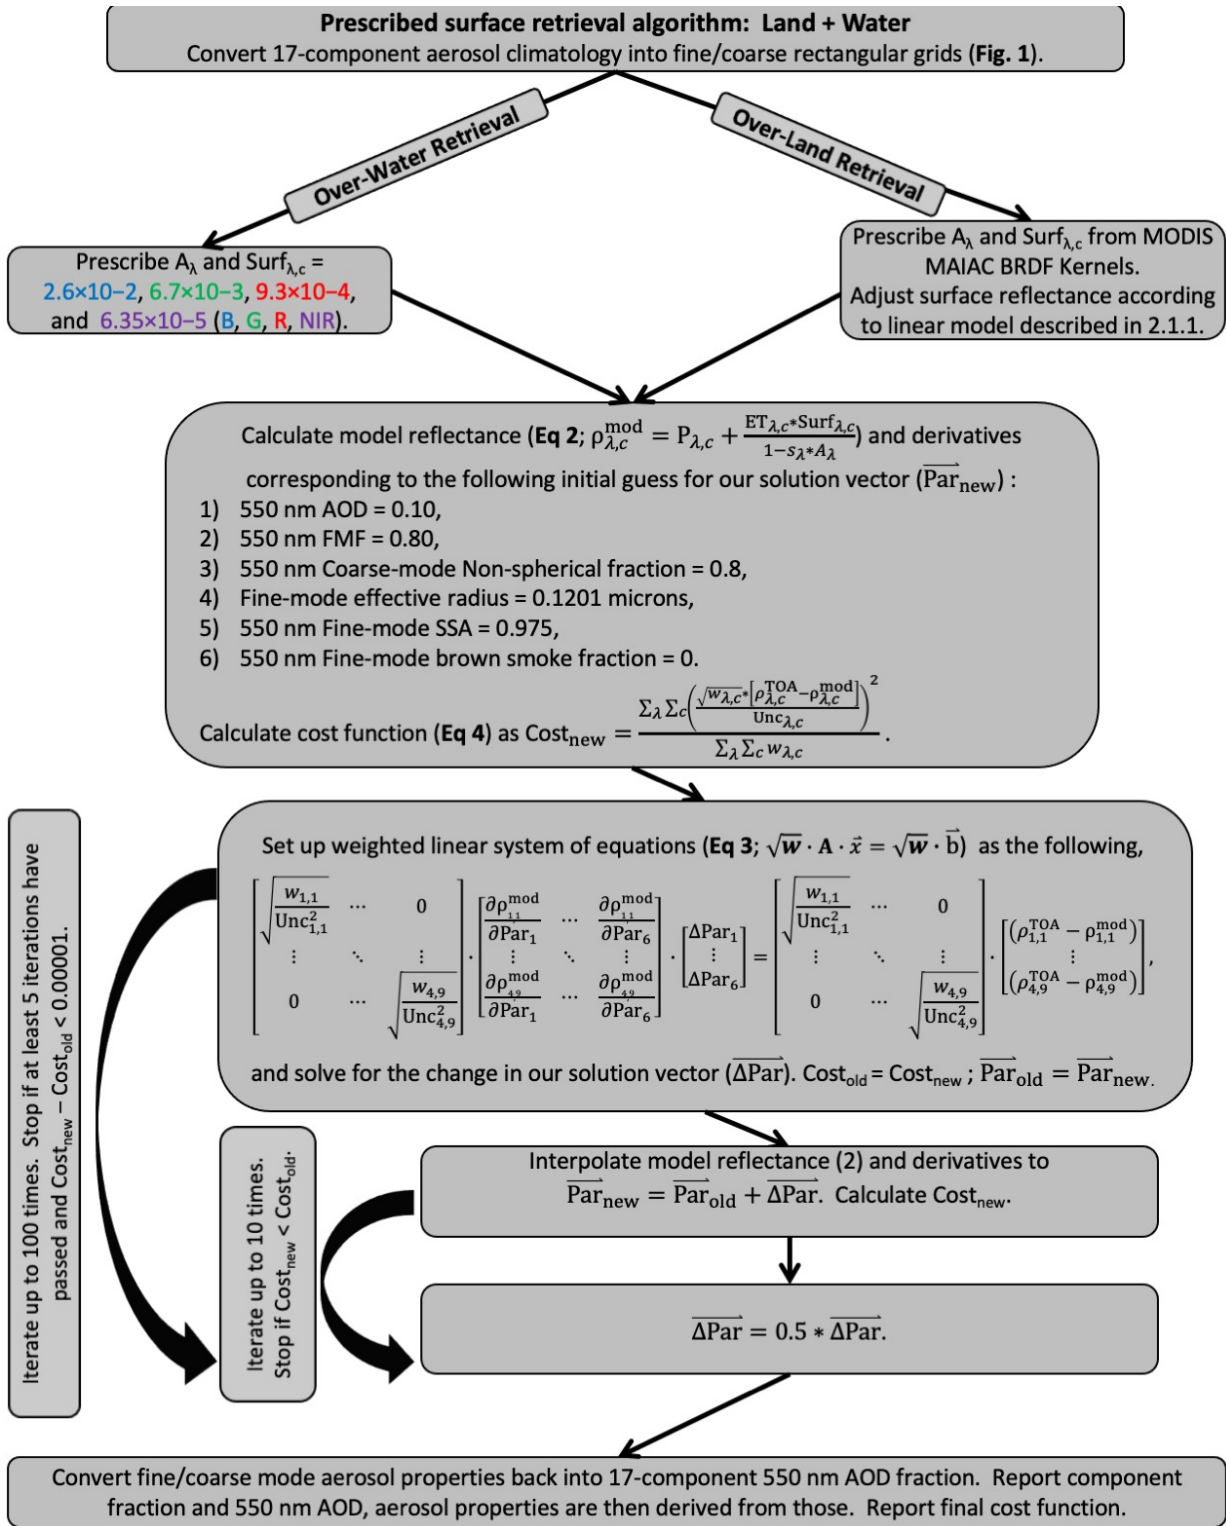

Figure S1) Flow chart of the MISR RA prescribed surface aerosol retrieval.

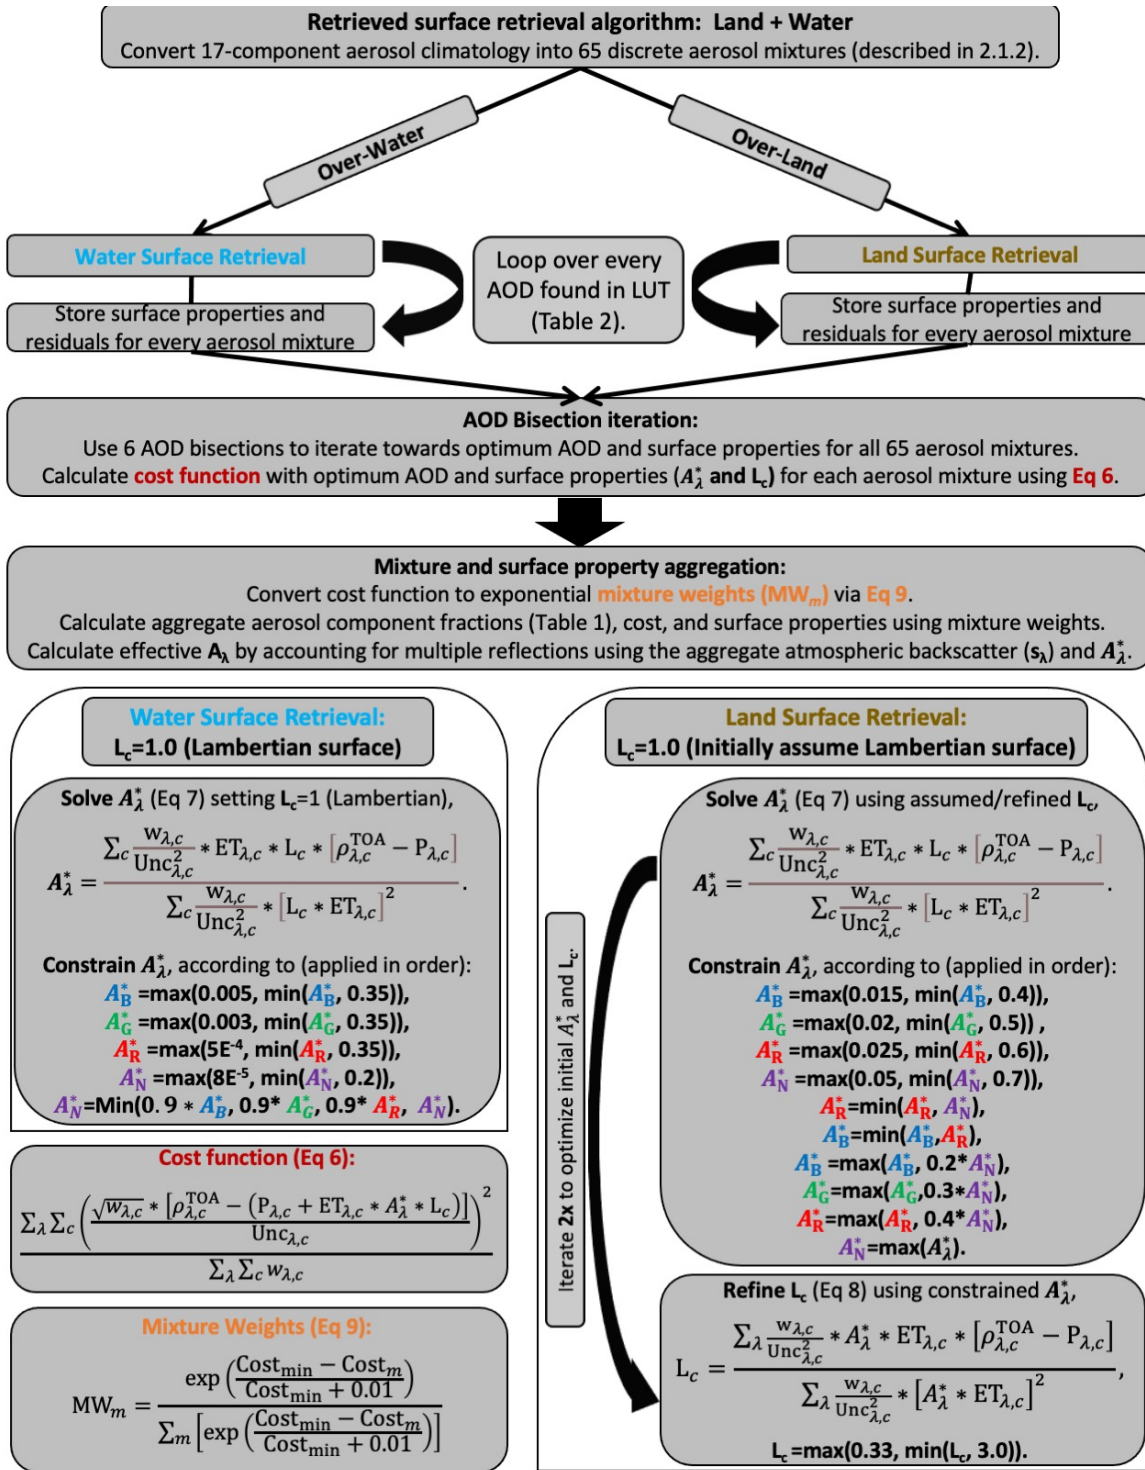

Figure S2) Flow chart of the MISR RA retrieved surface aerosol retrieval. Note the panel titled “Surface Retrieval Iteration”, which is referenced twice in the flow chart, and explains how surface reflectance is retrieved over both land and water.
